# Supplementary material for: Cytokine Signatures for Lung Cancer Diagnosis in African American Populations
Source: MDPI journal article supplement (doi:10.3390/jpm14010117), 2024-01-20
Supplement: s1 [file s1]

Supplementary files

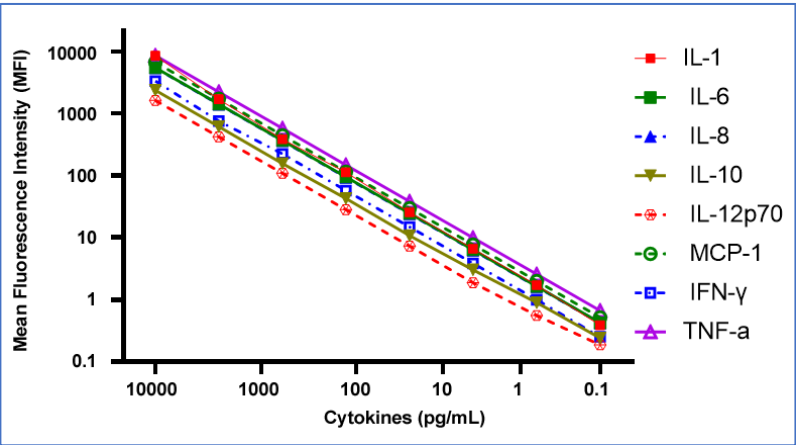

Supplementary Figure S1.

The wide dynamic range assessed for eight cytokines using the FirePlex Immunoassay. We prepared serial dilutions of standard analyte proteins in nuclease-free water, ranging from 0.1 to 10,000 pg/mL. This immunoassay reliably detects cytokines, even at 0.5 pg/mL, covering the entire 0.1 to 10,000 pg/mL range.

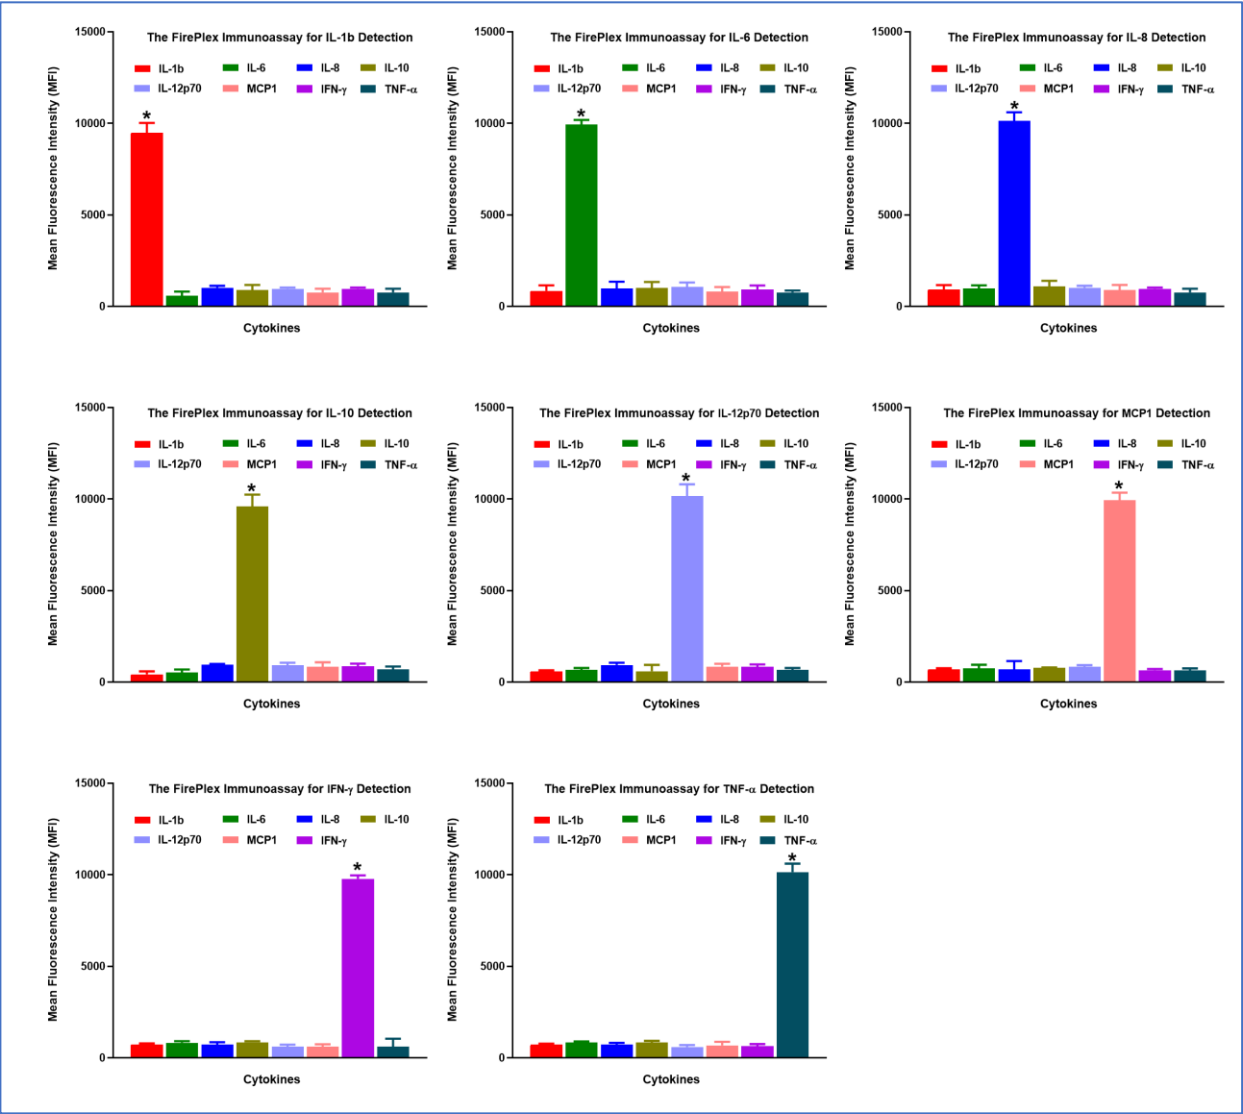

**Supplementary Figure S2.** The analytic specificity of the FirePlex Immunoassay for cytokine detection was assessed using a panel of cytokines. The X-axis represents each cytokine sample, while the Y-axis displays the mean fluorescence intensity (MFI) for each sample. Error bars depict the standard deviation of MFIs obtained from triplicates per sample. Significance levels are denoted as follows: \*  $p < 0.0001$ .

| <b>Supplementary Table S1.</b> Characteristics of Stage I NSCLC Patients and Cancer-Free Smokers in the Second Validation Set |                       |                     |
|-------------------------------------------------------------------------------------------------------------------------------|-----------------------|---------------------|
|                                                                                                                               | Cancer cases (n = 36) | Controls (n = 38)   |
| Age                                                                                                                           | 63.57<br>(SD 10.49)   | 65.43<br>(SD 10.46) |
| Sex                                                                                                                           |                       |                     |
| Female                                                                                                                        | 13                    | 12                  |
| Male                                                                                                                          | 23                    | 26                  |
| Race                                                                                                                          | All are AAs           | All are AAs         |
| Smoking pack-years                                                                                                            | 38.3                  | 35.7                |
| Stage                                                                                                                         | All are Stage I       |                     |
| Histological type                                                                                                             |                       |                     |
| Adenocarcinoma                                                                                                                | 16                    |                     |
| Squamous cell carcinoma                                                                                                       | 20                    |                     |

| <b>Supplementary Table S2.</b> Sensitivity and dynamic range of the FirePlex Immunoassay for the detection of the eight cytokines. |                       |                     |
|------------------------------------------------------------------------------------------------------------------------------------|-----------------------|---------------------|
| Cytokines                                                                                                                          | Dynamic Range (pg/mL) | Sensitivity (pg/mL) |
| IL-1                                                                                                                               | 1.62-8,970            | 0.79                |
| IL-6                                                                                                                               | 4.73-10,000           | 2.73                |
| IL-8                                                                                                                               | 0.56-9,984            | 0.55                |
| IL-10                                                                                                                              | 2.84-10,000           | 0.84                |
| IL-12p70                                                                                                                           | 4.18-10,000           | 1.57                |
| MCP-1                                                                                                                              | 1.95-10,000           | 0.72                |
| IFN- $\gamma$                                                                                                                      | 4.37-10,000           | 1.53                |
| TNF- $\alpha$                                                                                                                      | 3.78-10,000           | 1.05                |

| <b>Supplementary Table S3.</b> Day to day reproducibility of the FirePlex Immunoassay for the detection of cytokines. |         |
|-----------------------------------------------------------------------------------------------------------------------|---------|
| Cytokines                                                                                                             | *CV (%) |
| IL-1                                                                                                                  | 9.12    |
| IL-6                                                                                                                  | 7.49    |
| IL-8                                                                                                                  | 11.59   |
| IL-10                                                                                                                 | 10.35   |
| IL-12p70                                                                                                              | 11.17   |
| MCP-1                                                                                                                 | 5.52    |
| IFN- $\gamma$                                                                                                         | 6.39    |
| TNF- $\alpha$                                                                                                         | 8.37    |
| *, CV, coefficient of variation.                                                                                      |         |

| <b>Supplementary Table S4.</b> Inter-assay precision of the FirePlex Immunoassay for the detection of cytokines. |         |
|------------------------------------------------------------------------------------------------------------------|---------|
| Cytokines                                                                                                        | *CV (%) |

|                                  |       |
|----------------------------------|-------|
| IL-1                             | 11.32 |
| IL-6                             | 7.536 |
| IL-8                             | 12.67 |
| IL-10                            | 10.58 |
| IL-12p70                         | 9.53  |
| MCP-1                            | 11.73 |
| IFN- $\gamma$                    | 7.54  |
| TNF- $\alpha$                    | 6.72  |
| *, CV, coefficient of variation. |       |

| Supplementary Table S5. Intra-assay precision of the FirePlex Immunoassay for the detection of cytokines. |        |
|-----------------------------------------------------------------------------------------------------------|--------|
| Cytokines                                                                                                 | CV (%) |
| IL-1                                                                                                      | 7.904  |
| IL-6                                                                                                      | 10.25  |
| IL-8                                                                                                      | 7.742  |
| IL-10                                                                                                     | 11.43  |
| IL-12p70                                                                                                  | 7.32   |
| MCP-1                                                                                                     | 9.72   |
| IFN- $\gamma$                                                                                             | 10.21  |
| TNF- $\alpha$                                                                                             | 6.45   |

**Supplementary Table S6.** Associations between cytokines and clinical and demographic data, analyzed using Spearman's rank correlation coefficients. \*,  $p < 0.05$ .

|               | IL-6         | IL-8  | IL-10        | MCP1         | IFN- $\gamma$ | TNF- $\alpha$ | Age          | Sex          | Race  | Smoking | Stage        | Histology    |
|---------------|--------------|-------|--------------|--------------|---------------|---------------|--------------|--------------|-------|---------|--------------|--------------|
| IL-6          | 1.00         | 0.31  | 0.28         | 0.16         | 0.07          | 0.33          | 0.21         | -0.09        | 0.11  | 0.18    | 0.17         | <b>0.04*</b> |
| IL-8          | 0.31         | 1.00  | 0.26         | 0.37         | 0.07          | 0.35          | 0.20         | -0.01        | 0.12  | 0.02    | 0.14         | -0.08        |
| IL-10         | 0.28         | 0.26  | 1.00         | 0.25         | -0.13         | 0.40          | <b>0.03*</b> | 0.07         | -0.08 | -0.13   | -0.05        | <b>0.03*</b> |
| MCP1          | 0.16         | 0.37  | 0.25         | 1.00         | -0.12         | 0.42          | -0.09        | <b>0.02*</b> | 0.20  | -0.09   | 0.10         | <b>0.02*</b> |
| IFN- $\gamma$ | 0.07         | 0.07  | -0.13        | -0.12        | 1.00          | -0.04         | -0.01        | 0.36         | -0.02 | 0.11    | -0.08        | -0.20        |
| TNF- $\alpha$ | 0.33         | 0.35  | 0.40         | 0.42         | -0.04         | 1.00          | 0.36         | 0.07         | 0.14  | -0.09   | -0.01        | -0.19        |
| Age           | 0.21         | 0.20  | <b>0.03*</b> | -0.09        | -0.01         | 0.04          | 1.00         | -0.13        | 0.29  | 0.36    | -0.05        | 0.14         |
| Sex           | -0.09        | -0.01 | 0.07         | <b>0.02*</b> | 0.36          | 0.07          | -0.13        | 1.00         | -0.03 | -0.13   | <b>0.01*</b> | -0.28        |
| Race          | 0.11         | 0.12  | -0.08        | 0.20         | -0.02         | 0.14          | 0.29         | -0.03        | 1.00  | 0.37    | 0.06         | 0.25         |
| Smoking       | 0.18         | 0.02  | -0.13        | -0.09        | 0.11          | -0.09         | 0.36         | -0.13        | 0.37  | 1.00    | 0.12         | 0.34         |
| Stage         | 0.17         | 0.14  | -0.05        | 0.10         | -0.08         | -0.01         | -0.05        | <b>0.01*</b> | 0.06  | 0.12    | 1.00         | -0.05        |
| Histology     | <b>0.04*</b> | -0.08 | <b>0.03*</b> | <b>0.02*</b> | -0.20         | -0.19         | 0.14         | -0.28        | 0.25  | 0.34    | -0.05        | 1.00         |

| Supplementary Table S7. The diagnostic values of the individual panels in the exploratory set. |                           |                           |
|------------------------------------------------------------------------------------------------|---------------------------|---------------------------|
|                                                                                                | Sensitivity (%) (95% CI)  | Specificity (%) (95% CI)  |
| A panel of IL-8, IL-10, and MCP-1 for diagnosis of NSCLC in AAs                                | 75.56% (60.46% to 87.12%) | 79.31% (60.28% to 92.01%) |
| A panel of IL-8, IL-10, and MCP-1 for diagnosis of AC in AAs                                   | 81.48% (61.92% to 93.70%) | 79.31% (60.28% to 92.01%) |
| A panel of IL-8, IL-10, and MCP-1 for diagnosis of SCC in AAs                                  | 66.67% (40.99% to 86.66%) | 79.31% (60.28% to 92.01%) |
| A panel of IL-6 and IL-8 for diagnosis of NSCLC in WAs                                         | 76.27% (63.41% to 86.38%) | 73.68% (48.80% to 90.85%) |

|                                                      |                           |                           |
|------------------------------------------------------|---------------------------|---------------------------|
| A panel of IL-6 and IL-8 for diagnosis of AC in WAs  | 80.00% (63.06% to 91.56%) | 73.68% (48.80% to 90.85%) |
| A panel of IL-6 and IL-8 for diagnosis of SCC in WAs | 70.83% (48.91% to 87.38%) | 73.68% (48.80% to 90.85%) |

| <b>Supplementary Table S8.</b> The diagnostic values of the individual panels in the validation set. |                           |                           |
|------------------------------------------------------------------------------------------------------|---------------------------|---------------------------|
|                                                                                                      | Sensitivity (%) (95% CI)  | Specificity (%) (95% CI)  |
| A panel of IL-8, IL-10, and MCP-1 for diagnosis of NSCLC in AAs                                      | 75.00% (55.13% to 89.31%) | 79.26% (64.28% to 86.85%) |
| A panel of IL-8, IL-10, and MCP-1 for diagnosis of AC in AAs                                         | 80.00% (51.91% to 95.67%) | 79.26% (64.28% to 86.85%) |
| A panel of IL-8, IL-10, and MCP-1 for diagnosis of SCC in AAs                                        | 69.23% (38.57% to 90.91%) | 79.26% (64.28% to 86.85%) |
| A panel of IL-6 and IL-8 for diagnosis of NSCLC in WAs                                               | 76.67% (57.72% to 90.07%) | 72.39% (59.10% to 83.34%) |
| A panel of IL-6 and IL-8 for diagnosis of AC in WAs                                                  | 82.35% (56.57% to 96.20%) | 72.39% (59.10% to 83.34%) |
| A panel of IL-6 and IL-8 for diagnosis of SCC in WAs                                                 | 76.92% (46.19% to 94.96%) | 72.39% (59.10% to 83.34%) |

| <b>Supplementary Table S9.</b> The diagnostic values of the individual panels in the second validation set. |                           |                           |
|-------------------------------------------------------------------------------------------------------------|---------------------------|---------------------------|
|                                                                                                             | Sensitivity (%) (95% CI)  | Specificity (%) (95% CI)  |
| A panel of IL-8, IL-10, and MCP-1 for diagnosis of NSCLC in AAs                                             | 75.00% (57.80% to 87.88%) | 79.95% (62.98% to 90.45%) |
